# Supplementary figures and images for: An Open Source Based High Content Screening Method for Cell Biology Laboratories Investigating Cell Spreading and Adhesion
Source: PLOS journal article supplement (doi:10.1371/journal.pone.0078212), 2013-10-21

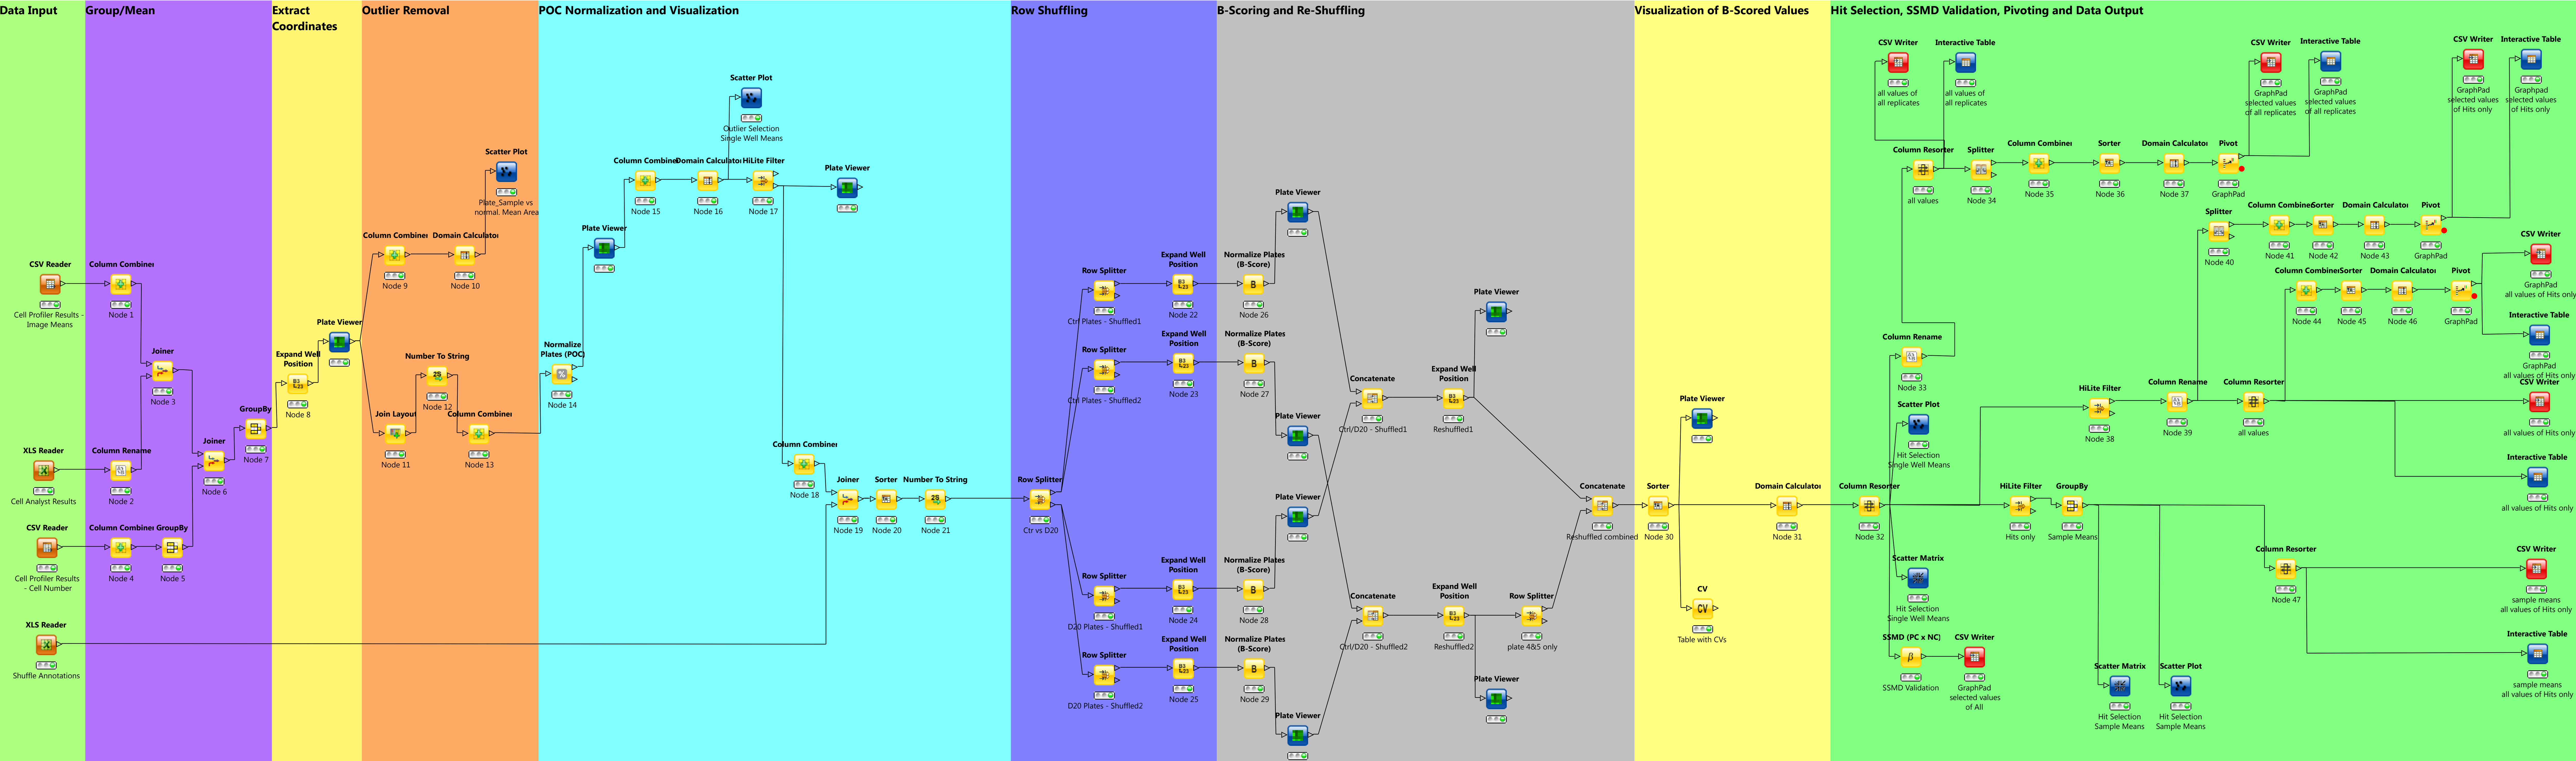

Supplement: S6 (10.1371/journal.pone.0078212.s006) [file journal.pone.0078212.s006]
